# Supplementary material
Source: PubMed Central journal article supplement (PMC4751853)
Supplement: AEM.03140-15_zam999116919so1.pdf [file AEM.03140-15_zam999116919so1.pdf]

1 **Single-cell Genomics-Facilitated Read-first Binning of Candidate Phylum EM19 Genomes**  
2 **from Geothermal Spring Metagenomes**

3  
4 **Supplemental Section I: Calescamantes Assembled Genome Alignment**

5 Calescamantes SAG co-assembly from GBS was aligned with Progressive MAUVE to  
6 the metagenome assemblies obtained from GBS and Gongxiaoshe in Tengchong, China  
7 (Supplemental Figure 2). Contigs were matched between assemblies according to best BLASTN  
8 hit, and contigs were arranged by start position relative to the largest contig between assemblies.  
9 Contigs without a best BLASTN hit were added to the end of the alignment.

10 The GBS SAG co-assembly and metagenome assembly were largely syntenous along  
11 shared regions of the genome, and most variation between assemblies were hypothetical coding  
12 regions that did not have BLASTN hits, and were placed at the end of the alignment. In contrast,  
13 the SAG co-assembly was largely non-syntenous compared to the metagome assembly from  
14 Gongxiaoshe and the genomes only contained a few semi-syntenous regions.

15

16 **Supplemental Section II: 16S rRNA gene recovery from metagenome datasets**

17 The co-assembled SAG and MLP GBS metagenome assemblies contained one full-length  
18 16S rRNA and one full-length 23S rRNA gene sequence. The binned GXS and Octopus Spring  
19 assemblies, on the other hand, contained neither locus, likely because rRNA regions have  
20 different selection pressures on their nucleotide word frequencies (1). The recovery of these  
21 regions was accomplished using BLASTN with SAG 16S and 23S rRNA gene sequences as  
22 queries against the unassembled metagenome. Recovered reads were assembled, yielding full-  
23 length 16S and 23S rRNA sequences. Assembled sequences from GBS were 100% identical to  
24 the SAG co-assembly rRNA genes (Figure 3).

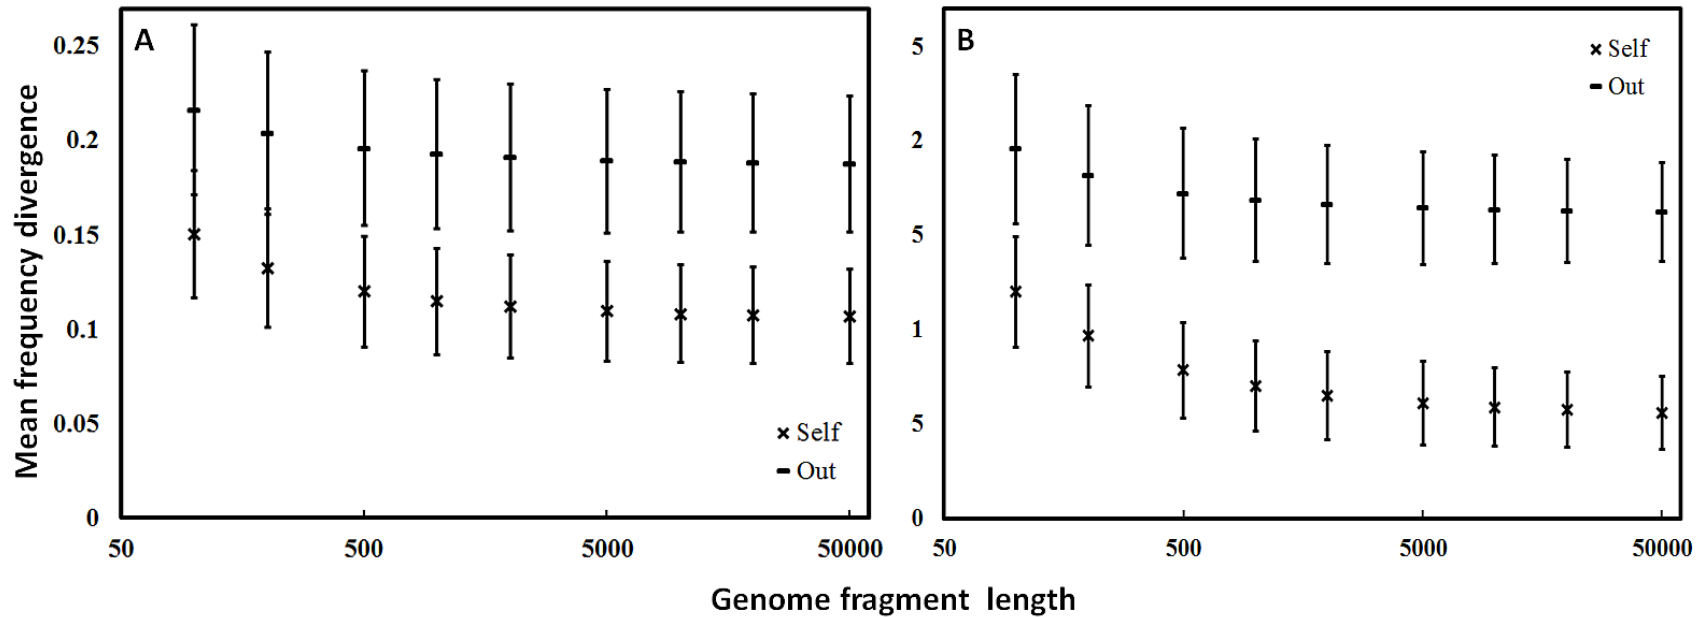

25

26 **Supplemental Figure 1.** Mean divergence of trimer frequencies of Illumina-sized (100 bp, panel A) and 454-sized (500 bp, panel B)  
 27 genomic fragments randomly selected from single-amplified genomes (SAGs) and other genomes from Genbank for multilayer  
 28 Perceptron (MLP) training. Model Illumina and 454 fragments were scored by their Euclidean distance to increasingly sized reference  
 29 fragments selected from the all genomes and separated into self vs. self and self vs. outgroup scores. The stabilization of the mean  
 30 divergence of trimer frequencies and the standard deviation separation between self and genome out groups appeared to occur when  
 31 using between 1000 and 5000 bp genomic fragments, indicating that these sized fragments would be optimal for the MLP training  
 32 algorithm. Error bars represent standard deviation from the mean.

33

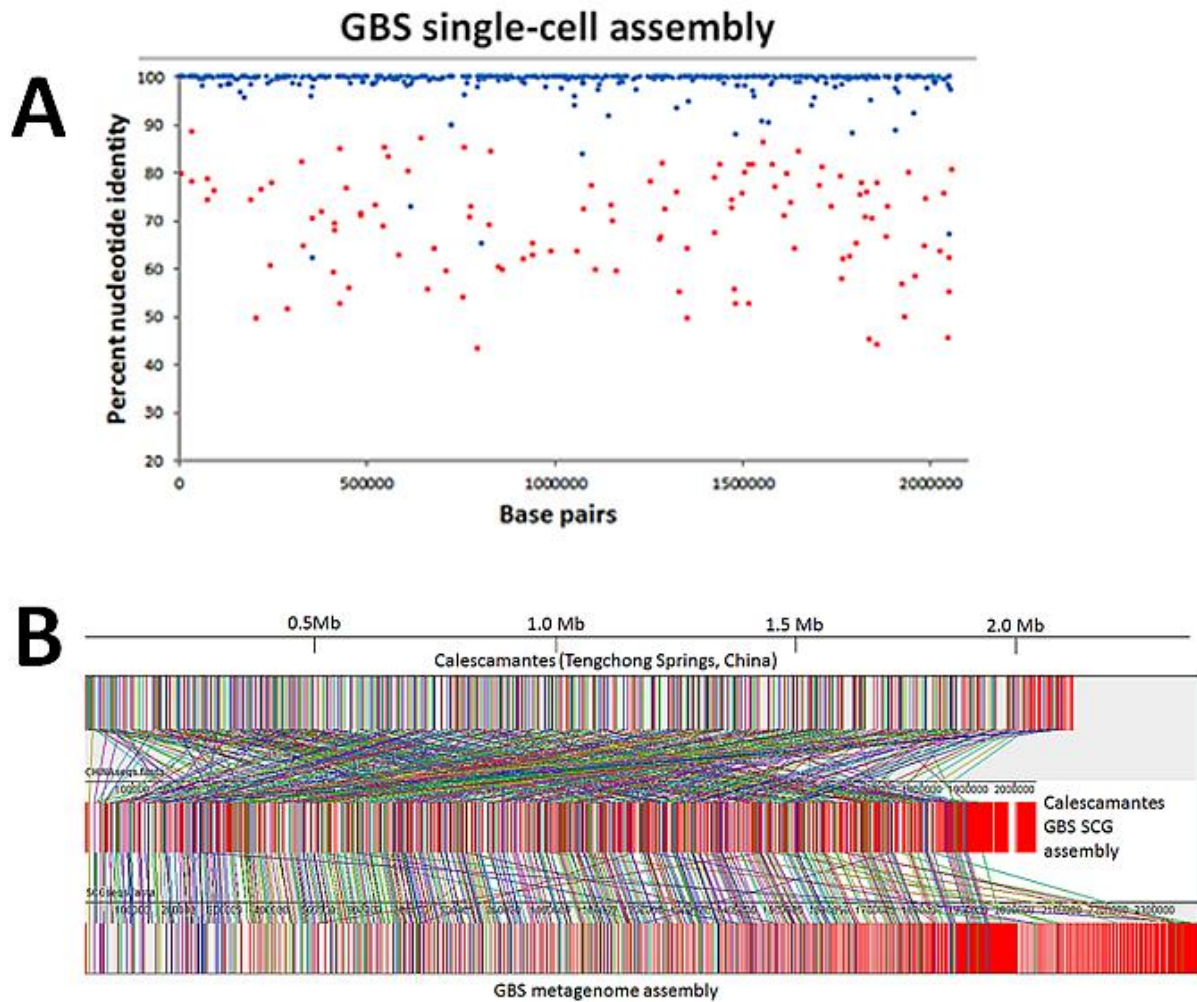

34

35 **Supplemental Figure 2.** (A) Recruitment plot of Great Boiling Spring (GBS; blue dots) and  
 36 Gongxiaoshe Spring (red dots) predicted protein regions to the GBS SAG co-assembly. (B)  
 37 MAUVE alignment of Calescamantes Gongxiaoshe assembly (top), and the GBS metagenome  
 38 assembly (bottom), to the GBS single-amplified genome (SAG) co-assembly (middle). Contigs  
 39 were ordered by best BLASTN hit and position relative to the largest contig between assemblies.  
 40 Contigs without BLASTN hits were added to the end of the alignment.

41

42

43

44

45

46

47

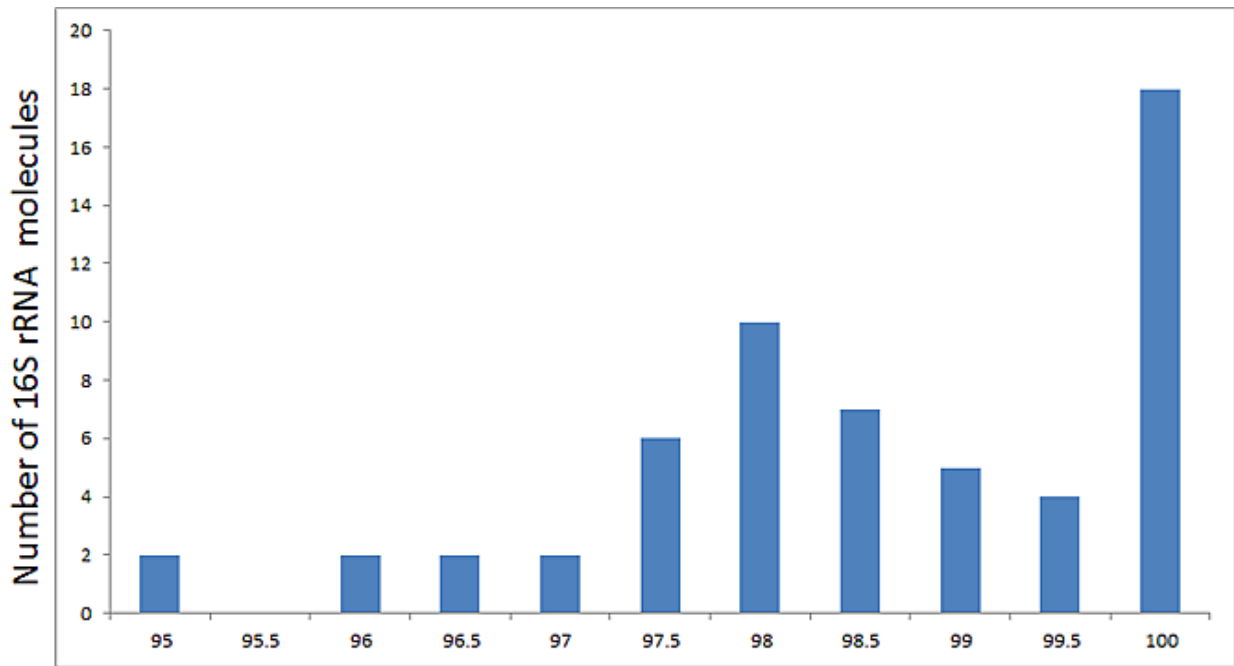

Percent identity to Octopus Spring 16S rRNA sequence

48

49 **Supplemental Figure 3.** 16S rRNA gene metagenomic reads in Octopus Spring aligned to the  
50 previously identified 16S rRNA sequence (2).

51

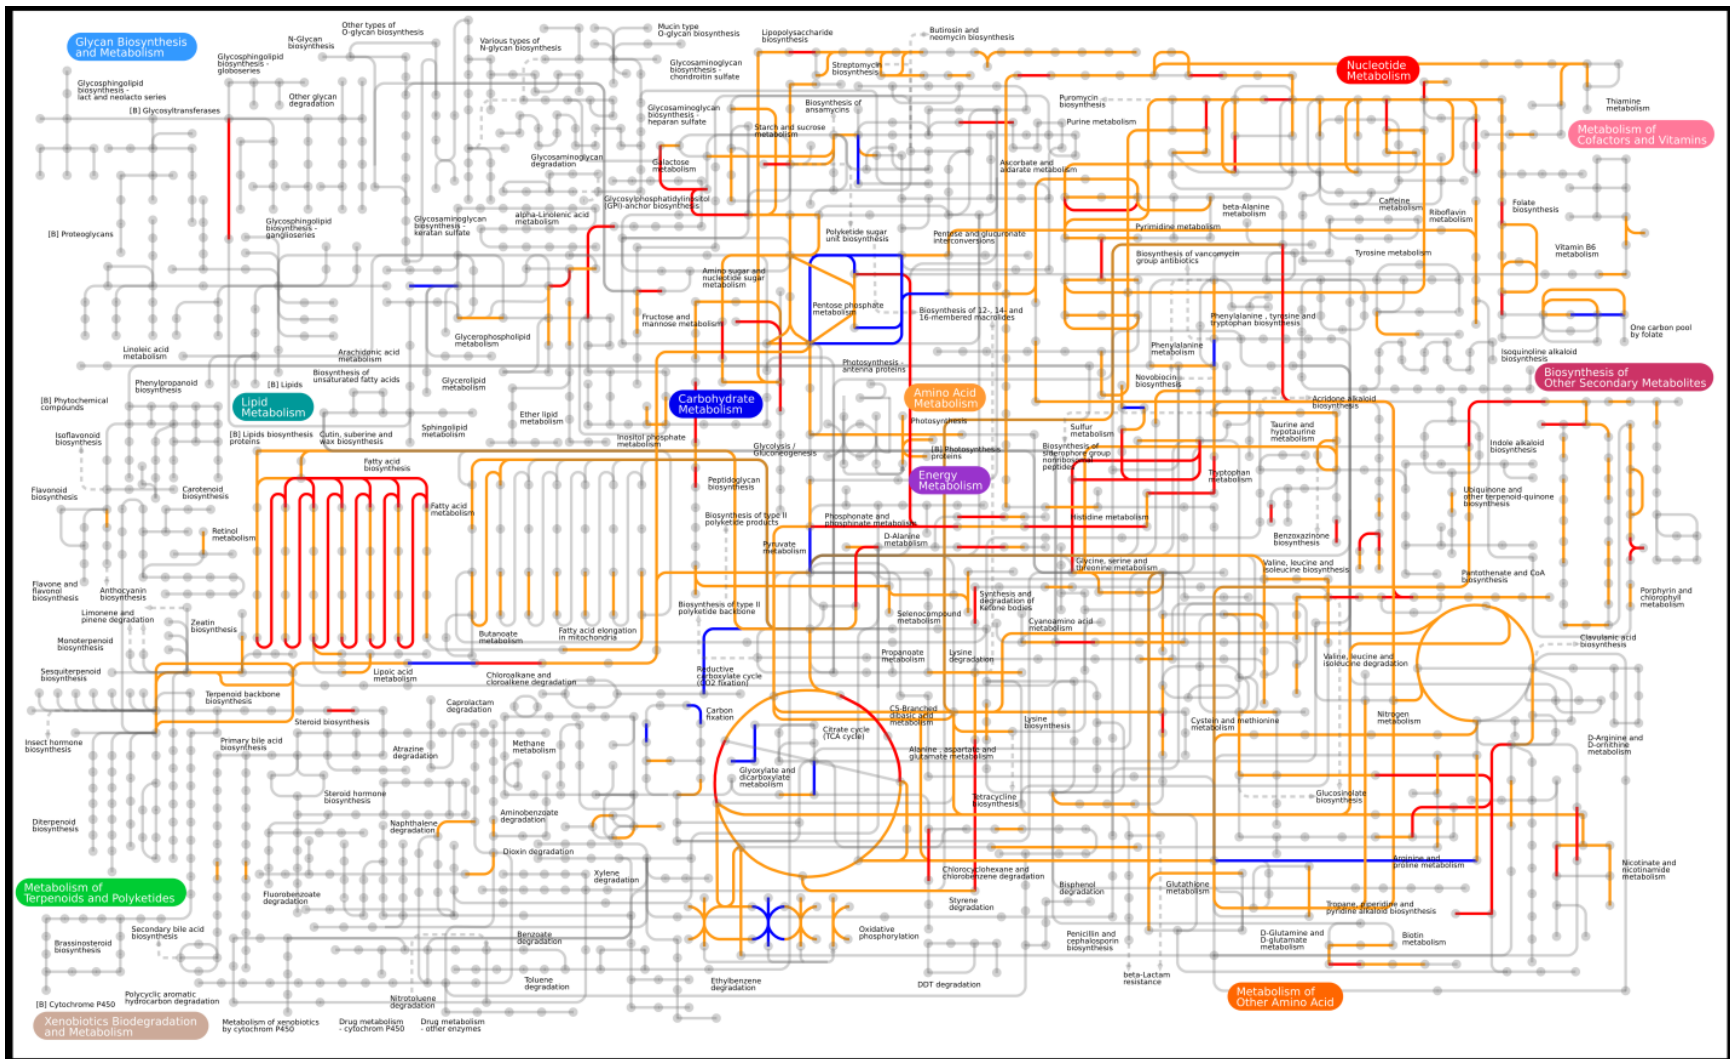

52  
53  
54  
55  
56  
57

**Supplemental Figure 4.** KEGG metabolic map comparing the predicted pathways of the single amplified genome (SAG) (red) and the Great Boiling Spring (GBS) Multi-layer Perceptron (MLP) metagenome assembly (blue) and shared pathways identified in both (orange). The map was generated using iPath 2.0 (3).

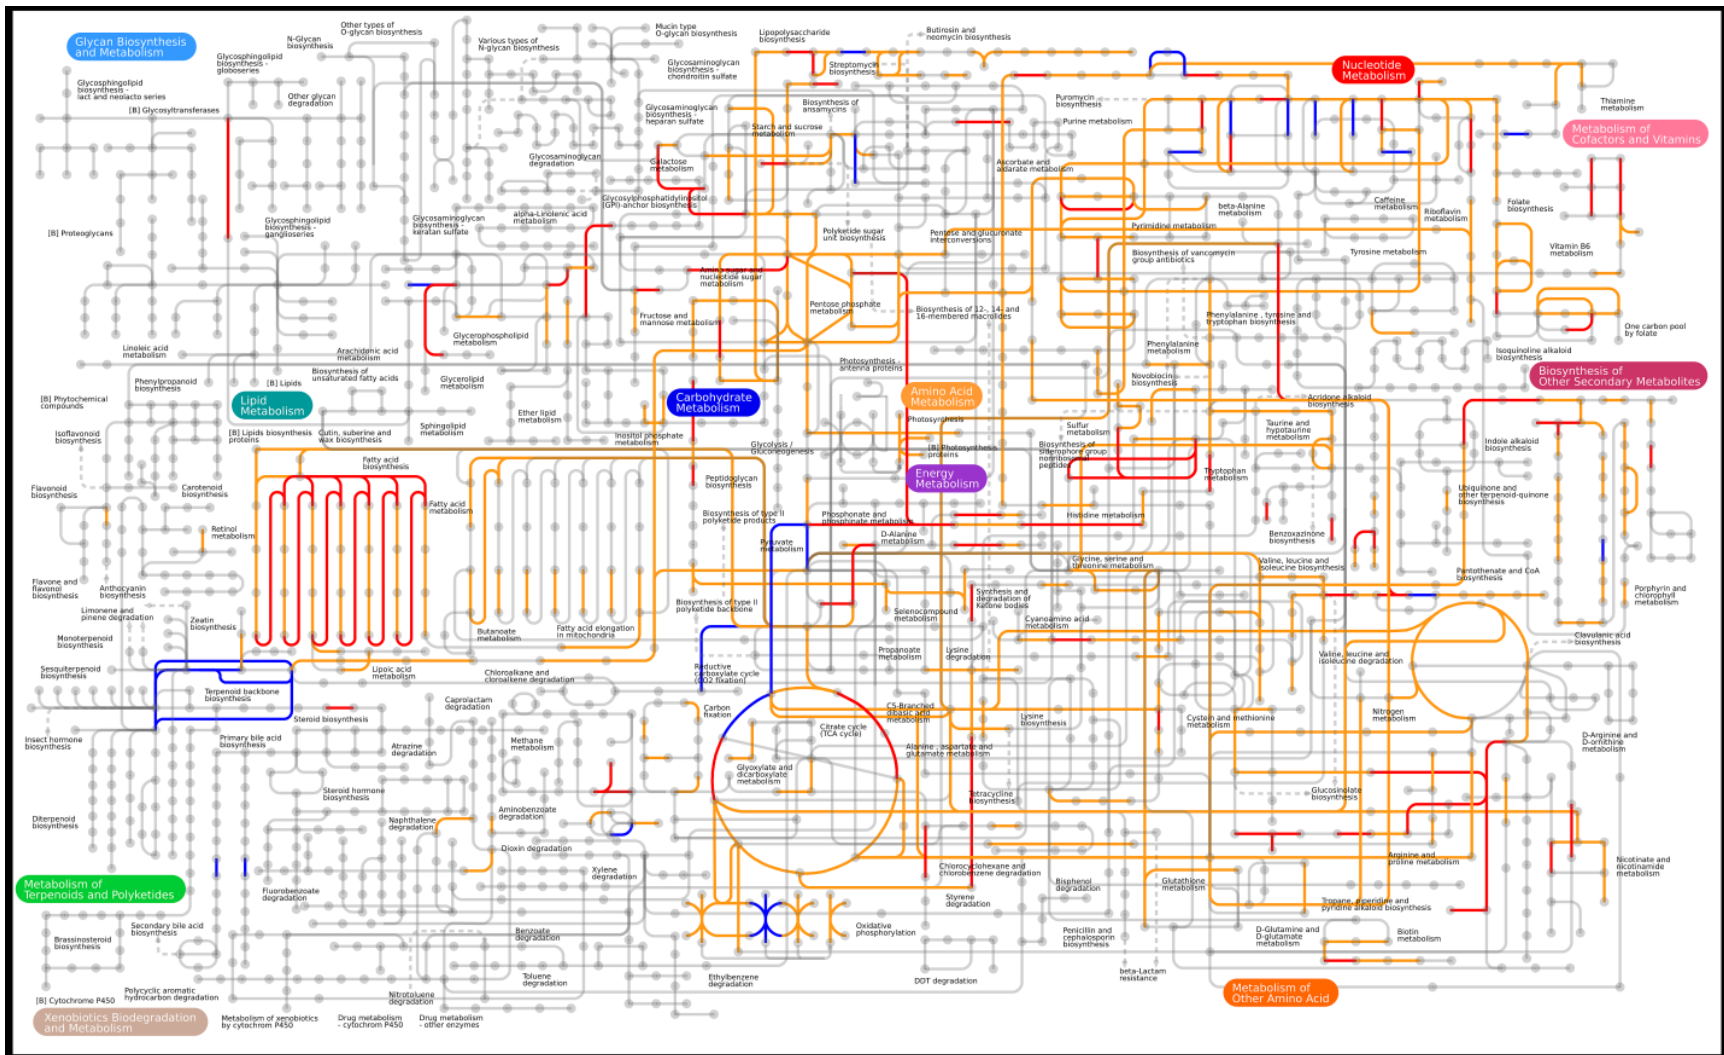

58  
 59 **Supplemental Figure 5.** KEGG metabolic map comparing the predicted pathways of the Great Boiling Spring (GBS) multilayer  
 60 perceptron (MLP) assembled genome (blue) and the Gonxiaoshe Spring (GXS) MLP metagenome assembly (red) and shared  
 61 pathways identified in both (orange). The map was generated using iPath 2.0 (3).  
 62

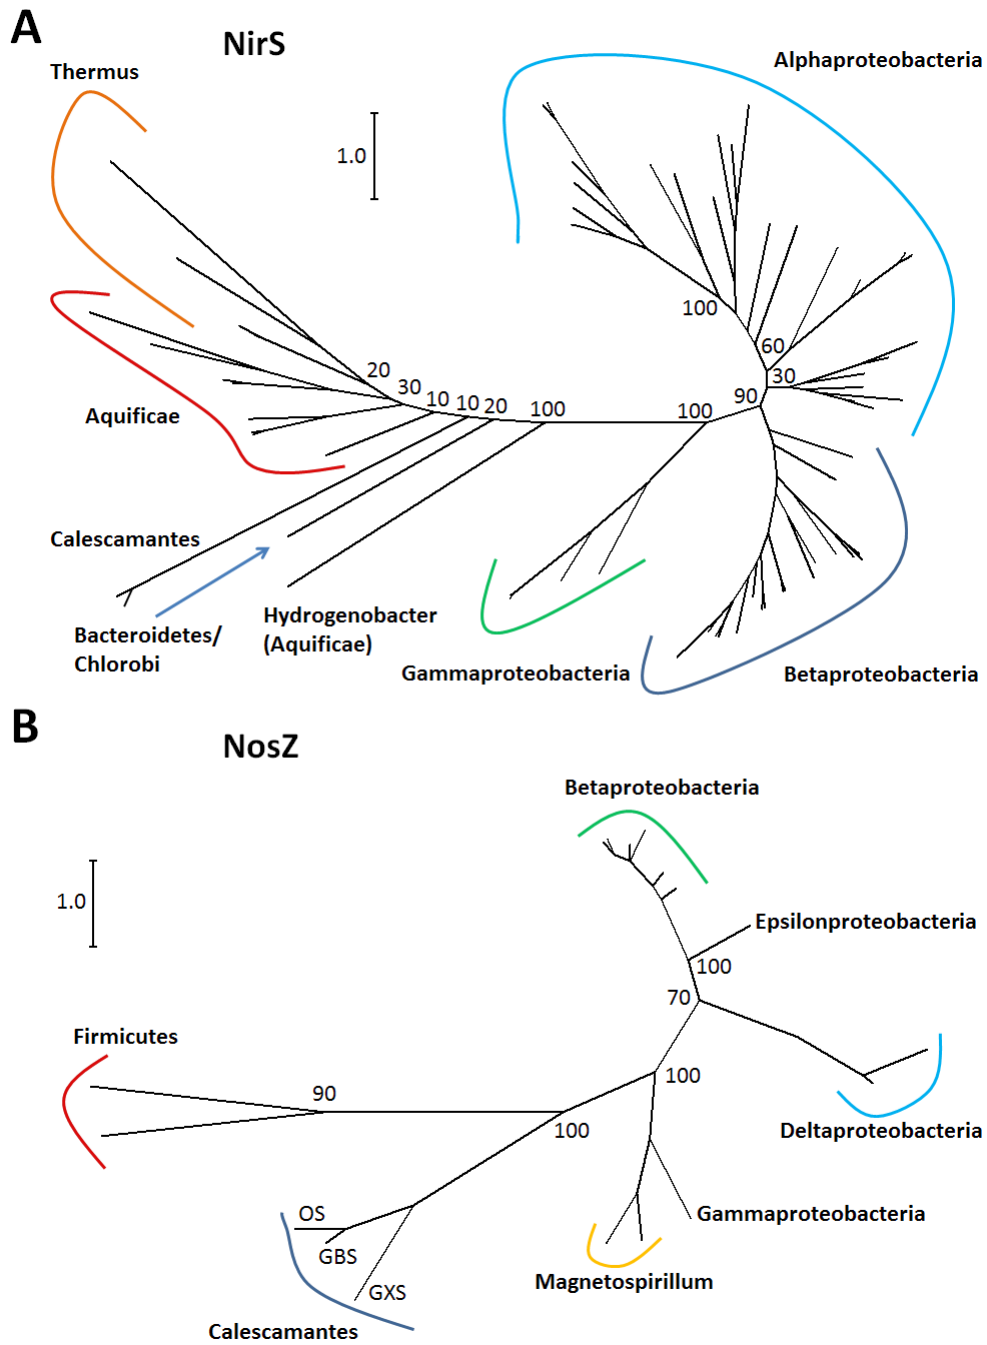

**Supplemental Figure 6.** Maximum-likelihood phylogenies of the top 100 BLASTP hits in Genbank to the Calescamantes A) NirS and B) NosZ proteins. Bootstrap values are reported for phylum-level nodes.

**Supplemental Table 1.** IMG IDs and Genbank accession numbers for *Calescamantes* single assembled genomes (SAGs) and metgenomic data sets. All individual SAG data are also located at <http://microbialdarkmatter.org/index.php/mdm-project/4-single-cell-data>.

| <b>Calescamantes SAG assemblies</b> <sup>1</sup>                     | <b>IMG Genome ID</b> | <b>Genbank Accession</b>       |
|----------------------------------------------------------------------|----------------------|--------------------------------|
| Calescamantes bacterium Combined SAG Assembly <sup>2</sup>           | 2527291514           | <a href="#">AWOA00000000.1</a> |
| Calescamantes bacterium JGI 0000106-I5 (GBS-C_001_287) <sup>3</sup>  | 2264867083           | <a href="#">ASNA00000000.1</a> |
| Calescamantes bacterium JGI 0000106-I17 (GBS-C_001_286) <sup>3</sup> | 2264867082           | <a href="#">ASMX00000000.1</a> |
| Calescamantes bacterium JGI 0000106-M22 (GBS-C_001_290) <sup>3</sup> | 2264867085           | <a href="#">ASMW00000000.1</a> |
| Calescamantes bacterium JGI 0000106-N5 (GBS-C_001_291) <sup>3</sup>  | 2264867086           | <a href="#">ASMT00000000.1</a> |
| Calescamantes bacterium JGI 0000106-P5 (GBS-C_001_294) <sup>3</sup>  | 2264867088           | <a href="#">ASMZ00000000.1</a> |
| Calescamantes bacterium JGI 0000106-G12 (GBS-C_001_282) <sup>3</sup> | 2264867080           | <a href="#">AQTE00000000.1</a> |
| Calescamantes bacterium SCGC AAA471-M6 (GBS-N_001_25) <sup>4</sup>   | 2264867079           | <a href="#">AQST00000000.1</a> |
| Calescamantes bacterium JGI 0000106-J16 (GBS-C_001_289) <sup>3</sup> | 2264867084           | <a href="#">ASMV00000000.1</a> |
| Calescamantes bacterium JGI 0000106-H18 (GBS-C_001_283) <sup>3</sup> | 2264867081           | <a href="#">ASMY00000000.1</a> |
| Calescamantes bacterium JGI 0000106-N7 (GBS-C_001_292) <sup>3</sup>  | 2264867087           | <a href="#">ASMU00000000.1</a> |
| <b>Metagenomes</b>                                                   |                      |                                |
| Great Boiling Spring sediment metagenome                             | 2053563014           | n/a                            |
| Gongxiaoshe hot spring sediment metagenome                           | 3300000865           | n/a                            |
| Octopus hot spring sediment metagenome                               | 3300001339           | n/a                            |
| Bison Pool sediment metagenome                                       | (1-5)_050719         | n/a                            |

<sup>1</sup> SAGs and coassembly from Rinke et al. 2013 (4).

<sup>2</sup> Coassembly included all SAGs except GBS-C\_001\_282 and GBS-N\_001\_25, based on ANI of >97% (4).

<sup>3</sup> Obtained from samples of the top ~1 cm of sediment taken from the main pool of Great Boiling Spring (N 40° 39.682' W 119° 21.973', corresponding to site C in (5) on 22 July 2010 (78 °C).

<sup>4</sup> Obtained from samples of the top ~1 cm of sediment taken from the main pool of Great Boiling Spring (N 40° 39.684' W 119° 21.973', corresponding to site B in (5) on 9 February 2010 (79.2 °C).



**Supplemental Table 2.** Pairwise comparison of average nucleotide identity (ANI) between Calescamantes Great Boiling Spring (GBS) single-amplified genome (SAG) co-assembly and multilayer perceptron (MLP) metagenome assemblies targeted in this study.

|                  | <b>GBS<br/>SAG</b> | <b>GBS<br/>MLP</b> | <b>Gxs<br/>MLP</b> | <b>Oct<br/>MLP</b> | <b>Bison MLP</b> |
|------------------|--------------------|--------------------|--------------------|--------------------|------------------|
| <b>GBS SAG</b>   | 100                |                    |                    |                    |                  |
| <b>GBS MLP</b>   | 99.45              | 100                |                    |                    |                  |
| <b>Gxs MLP</b>   | 76.37              | low <sup>1</sup>   | 100                |                    |                  |
| <b>Oct MLP</b>   | 88.42              | 88.6               | low                | 100                |                  |
| <b>Bison MLP</b> | 85.46              | 85.71              | low                | 92.51              | 100              |

<sup>1</sup>low = too few hits to be accurately calculated (6).

**Supplemental Table 3.** Citric acid cycle (TCA) enzymes identified by KAAS in the Calescamantes single-amplified genome (SAG) and Multi-Layer Perceptron (MLP) assemblies from Great Boiling Spring.

| <b>Reaction</b>               | <b>Enzyme</b>                            | <b>IMG number</b>  |
|-------------------------------|------------------------------------------|--------------------|
| PPP → oxaloacetate            | phosphoenolpyruvate carboxylase          | EM19COM1_02016     |
| oxaloacetate → citrate        | citrate synthase                         | EM19COM1_01336     |
| citrate → isocitrate          | isocitrate hydratase <sup>1</sup>        | EM19COM1_00283     |
| isocitrate → oxalosuccinate   | isocitrate dehydrogenase                 | EM19COM1_01479     |
| oxalosuccinate → oxoglutarate | isocitrate dehydrogenase                 | EM19COM1_01479     |
| oxoglutarate → succinyl-CoA   | 2-oxoglutarate ferredoxin oxidoreductase | EM19COM1_01888     |
| succinyl-CoA → succinate      | succinyl-CoA synthetase                  | EM19COM1_00047/48  |
| succinate → fumarate          | succinate dehydrogenase                  | EM19COM1_00693/482 |
| fumarate → malate             | fumarate hydratase <sup>a</sup>          | EM19COM1_01222     |
| malate → oxaloacetate         | malate dehydrogenase                     | EM19COM1_00179     |

<sup>1</sup> Enzyme is only present in the SAG co-assembly.

**Supplemental Table 4.** Lipid markers typically observed in Gram-negative organisms for the Bison Pool, Octopus Spring, Great Boiling Spring (GBS) and Gongxiaoshe Spring (GXS) multi-layer perceptron (MLP) assemblies and the single-amplified genome (SAG) co-assembly identified by (7).

| <b>RAST gene number</b>    | <b>Gene function</b> | <b>PFAM number</b> |
|----------------------------|----------------------|--------------------|
| <b>Bison_MLP</b>           |                      |                    |
| fig 6666666.83684.peg.1651 | Peptidase_A8         | PF01252            |
| fig 6666666.83684.peg.1654 | Peptidase_A8         | PF01252            |
| fig 6666666.83684.peg.1569 | LpxC                 | PF03331            |
| fig 6666666.83684.peg.1408 | Surf_Ag_VNR          | PF07244            |
| <b>GBS_MLP</b>             |                      |                    |
| fig 6666666.73513.peg.111  | FlgH                 | PF02107            |
| fig 6666666.73513.peg.110  | FlgI                 | PF02119            |
| fig 6666666.73513.peg.709  | SecY                 | PF00344            |
| fig 6666666.73513.peg.298  | TatC                 | PF00902            |
| fig 6666666.73513.peg.1552 | LGT                  | PF01790            |
| fig 6666666.73513.peg.1074 | LGT                  | PF01790            |
| fig 6666666.73513.peg.17   | Peptidase_A8         | PF01252            |
| fig 6666666.73513.peg.107  | Bac_surface_Ag       | PF01103            |
| fig 6666666.73513.peg.1151 | Bac_surface_Ag       | PF01103            |
| fig 6666666.73513.peg.48   | OEP                  | PF02321            |
| fig 6666666.73513.peg.80   | OEP                  | PF02321            |
| fig 6666666.73513.peg.1337 | Secretin             | PF00263            |
| fig 6666666.73513.peg.441  | Secretin             | PF00263            |
| fig 6666666.73513.peg.1338 | Secretin_N           | PF03958            |
| fig 6666666.73513.peg.1337 | Secretin_N           | PF03958            |
| fig 6666666.73513.peg.1855 | LpxC                 | PF03331            |
| fig 6666666.73513.peg.2004 | LpxC                 | PF03331            |
| fig 6666666.73513.peg.1081 | OstA                 | PF03968            |
| fig 6666666.73513.peg.2187 | Surf_Ag_VNR          | PF07244            |
| fig 6666666.73513.peg.107  | Surf_Ag_VNR          | PF07244            |
| fig 6666666.73513.peg.1613 | Surf_Ag_VNR          | PF07244            |
| fig 6666666.73513.peg.784  | LolA                 | PF03548            |
| <b>GBS_SAG_co-assembly</b> |                      |                    |
| fig 6666666.85483.peg.520  | FlgH                 | PF02107            |
| fig 6666666.85483.peg.519  | FlgI                 | PF02119            |
| fig 6666666.85483.peg.1841 | SecY                 | PF00344            |
| fig 6666666.85483.peg.196  | TatC                 | PF00902            |
| fig 6666666.85483.peg.1129 | LGT                  | PF01790            |
| fig 6666666.85483.peg.117  | LGT                  | PF01790            |
| fig 6666666.85483.peg.516  | Bac_surface_Ag       | PF01103            |
| fig 6666666.85483.peg.1545 | Bac_surface_Ag       | PF01103            |
| fig 6666666.85483.peg.243  | OEP                  | PF02321            |
| fig 6666666.85483.peg.434  | OEP                  | PF02321            |
| fig 6666666.85483.peg.1798 | Secretin             | PF00263            |

|                            |             |         |
|----------------------------|-------------|---------|
| fig 6666666.85483.peg.1115 | Secretin    | PF00263 |
| fig 6666666.85483.peg.1798 | Secretin_N  | PF03958 |
| fig 6666666.85483.peg.1925 | LpxC        | PF03331 |
| fig 6666666.85483.peg.1200 | OstA        | PF03968 |
| fig 6666666.85483.peg.516  | Surf_Ag_VNR | PF07244 |
| fig 6666666.85483.peg.1545 | Surf_Ag_VNR | PF07244 |
| fig 6666666.85483.peg.1685 | LolA        | PF03548 |

**GXS\_MLP**

---

|                            |                |         |
|----------------------------|----------------|---------|
| fig 6666666.80949.peg.634  | FlgH           | PF02107 |
| fig 6666666.80949.peg.633  | FlgI           | PF02119 |
| fig 6666666.80949.peg.1575 | SecY           | PF00344 |
| fig 6666666.80949.peg.9    | TatC           | PF00902 |
| fig 6666666.80949.peg.1563 | LGT            | PF01790 |
| fig 6666666.80949.peg.581  | LGT            | PF01790 |
| fig 6666666.80949.peg.387  | Peptidase_A8   | PF01252 |
| fig 6666666.80949.peg.1746 | Bac_surface_Ag | PF01103 |
| fig 6666666.80949.peg.355  | Bac_surface_Ag | PF01103 |
| fig 6666666.80949.peg.856  | OEP            | PF02321 |
| fig 6666666.80949.peg.2132 | OEP            | PF02321 |
| fig 6666666.80949.peg.60   | Secretin       | PF00263 |
| fig 6666666.80949.peg.640  | Secretin       | PF00263 |
| fig 6666666.80949.peg.60   | Secretin_N     | PF03958 |
| fig 6666666.80949.peg.1577 | LpxC           | PF03331 |
| fig 6666666.80949.peg.629  | OstA           | PF03968 |
| fig 6666666.80949.peg.1746 | Surf_Ag_VNR    | PF07244 |
| fig 6666666.80949.peg.355  | Surf_Ag_VNR    | PF07244 |
| fig 6666666.80949.peg.1797 | LolA           | PF03548 |

**Octopus Spring\_MLP**

---

|                            |                |         |
|----------------------------|----------------|---------|
| fig 6666666.89741.peg.299  | FlgI           | PF02119 |
| fig 6666666.89741.peg.1359 | SecY           | PF00344 |
| fig 6666666.89741.peg.1247 | TatC           | PF00902 |
| fig 6666666.89741.peg.1354 | LGT            | PF01790 |
| fig 6666666.89741.peg.212  | LGT            | PF01790 |
| fig 6666666.89741.peg.495  | LGT            | PF01790 |
| fig 6666666.89741.peg.1874 | Bac_surface_Ag | PF01103 |
| fig 6666666.89741.peg.258  | OEP            | PF02321 |
| fig 6666666.89741.peg.1557 | Secretin       | PF00263 |
| fig 6666666.89741.peg.443  | LpxC           | PF03331 |
| fig 6666666.89741.peg.1001 | OstA           | PF03968 |
| fig 6666666.89741.peg.1874 | Surf_Ag_VNR    | PF07244 |

---

### Supplemental references:

1. **Wang HC, Hickey DA.** 2002. Evidence for strong selective constraint acting on the nucleotide composition of 16S ribosomal RNA genes. *Nucleic Acids Res* **30**:2501-2507.
2. **Reysenbach AL, Wickham GS, Pace NR.** 1994. Phylogenetic analysis of the hyperthermophilic pink filament community in Octopus Spring, Yellowstone National Park. *Appl Environ Microbiol* **60**:2113-2119.
3. **Yamada T, Letunic I, Okuda S, Kanehisa M, Bork P.** 2011. iPath2.0: interactive pathway explorer. *Nucleic Acids Research* **39**:W412-W415.
4. **Rinke C, Schwientek P, Sczyrba A, Ivanova NN, Anderson IJ, Cheng J-F, Darling A, Malfatti S, Swan BK, Gies EA, Dodsworth JA, Hedlund BP, Tsiamis G, Sievert SM, Liu W-T, Eisen JA, Hallam SJ, Kyrpides NC, Stepanauskas R, Rubin EM, Hugenholtz P, Woyke T.** 2013. Insights into the phylogeny and coding potential of microbial dark matter. *Nature* **499**:431-437.
5. **Cole JK, Peacock JP, Dodsworth JA, Williams AJ, Thompson DB, Dong H, Wu G, Hedlund BP.** 2012. Sediment microbial communities in Great Boiling Spring are controlled by temperature and distinct from water communities. *The ISME Journal* **7**:718-729.
6. **Goris J, Konstantinidis KT, Klappenbach JA, Coenye T, Vandamme P, Tiedje JM.** 2007. DNA-DNA hybridization values and their relationship to whole-genome sequence similarities. *Int J Syst Evol Microbiol* **57**:81-91.
7. **Sutcliffe IC.** 2010. A phylum level perspective on bacterial cell envelope architecture. *Trends in Microbiology* **18**:464-470.
